# Supplementary material for: Protein Levels of Anti-Apoptotic Mcl-1 and the Deubiquitinase USP9x Are Cooperatively Upregulated during Prostate Cancer Progression and Limit Response of Prostate Cancer Cells to Radiotherapy
Source: MDPI journal article supplement (doi:10.3390/cancers15092496), 2023-04-26

PC3

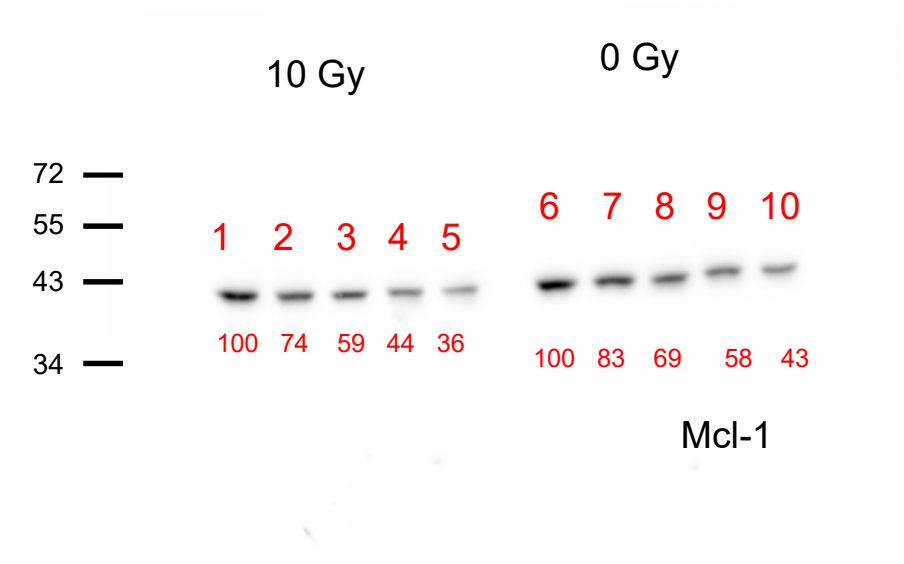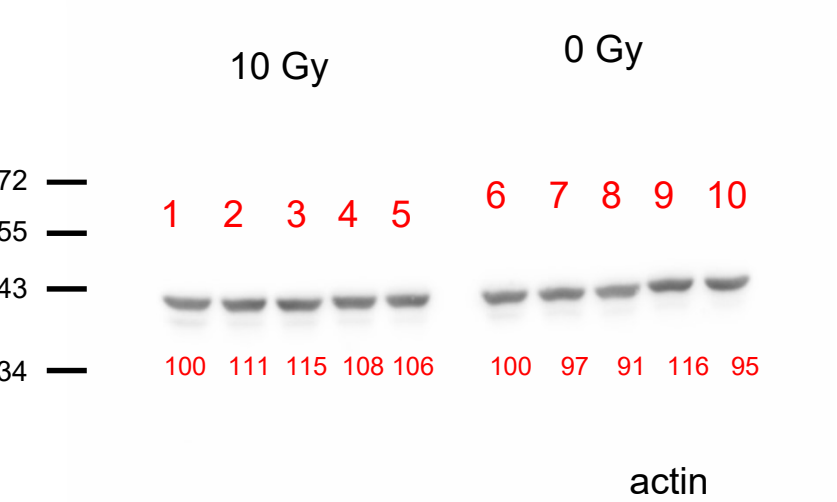

PC3

- 1: 0 Gy, CHX 0 min
- 2: 0 Gy, CHX 15 min
- 3: 0 Gy, CHX 30 min
- 4: 0 Gy, CHX 45 min
- 5: 0 Gy, CHX 60 min
- 6: 10 Gy, CHX 0 min
- 7: 10 Gy, CHX 15 min
- 8: 10 Gy, CHX 30 min
- 9: 10 Gy, CHX 45 min
- 10: 10 Gy, CHX 60 min

LNCaP

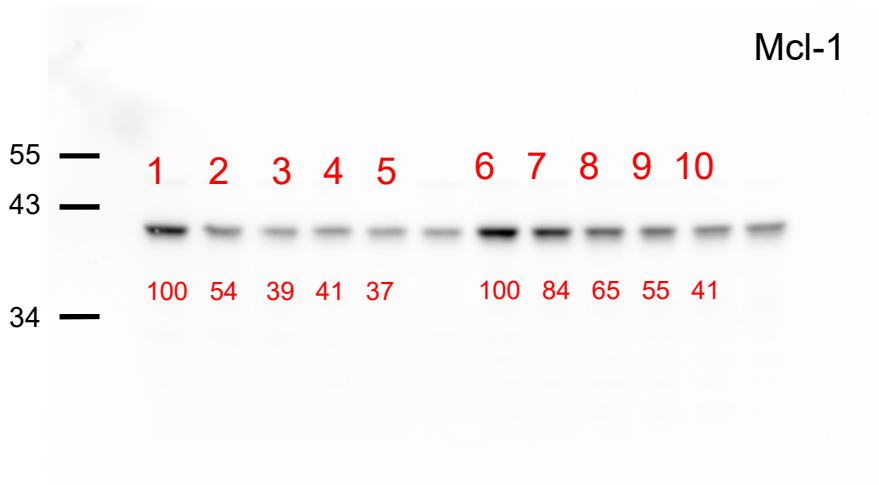

LNCaP

- 1: 0 Gy, CHX 0 min
- 2: 0 Gy, CHX 15 min
- 3: 0 Gy, CHX 30 min
- 4: 0 Gy, CHX 45 min
- 5: 0 Gy, CHX 60 min
- 6: 10 Gy, CHX 0 min
- 7: 10 Gy, CHX 15 min
- 8: 10 Gy, CHX 30 min
- 9: 10 Gy, CHX 45 min
- 10: 10 Gy, CHX 60 min

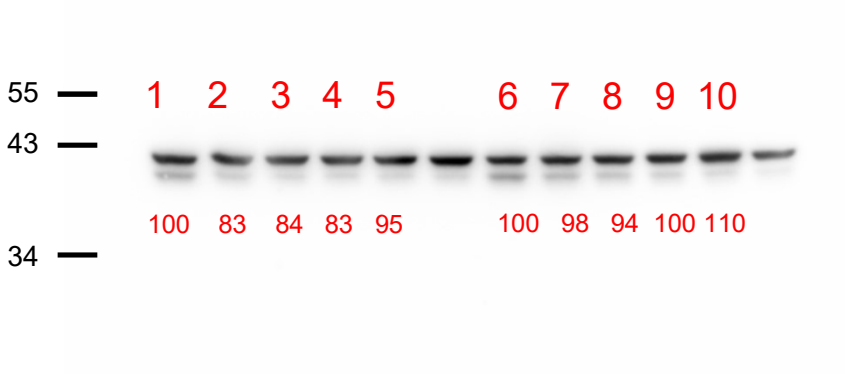

Supplement: s1 [file s1]
