# Supplementary material for: Protein Levels of Anti-Apoptotic Mcl-1 and the Deubiquitinase USP9x Are Cooperatively Upregulated during Prostate Cancer Progression and Limit Response of Prostate Cancer Cells to Radiotherapy
Source: MDPI journal article supplement (doi:10.3390/cancers15092496), 2023-04-26

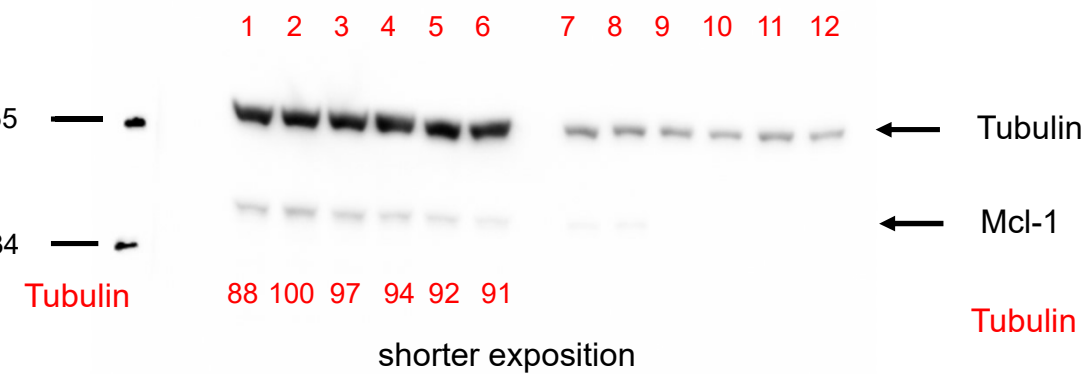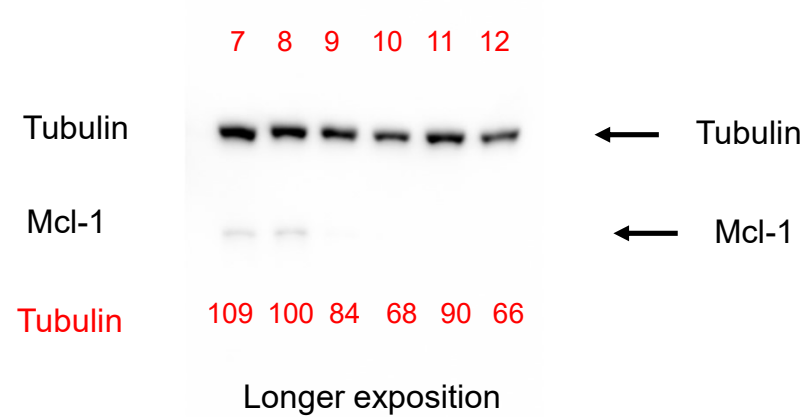

- 1: Ctrl
- 2: non-targeting siRNA (100 nM)
- 3: Mcl-1 siRNA (10 nM)
- 4: Mcl-1 siRNA (25 nM)
- 5: Mcl-1 siRNA (50 nM)
- 6: Mcl-1 siRNA (100 nM)

- 7: Ctrl
- 8: non-targeting siRNA (100 nM)
- 9: Mcl-1 siRNA (10 nM)
- 10: Mcl-1 siRNA (25 nM)
- 11: Mcl-1 siRNA (50 nM)
- 12: Mcl-1 siRNA (100 nM)

USP9x

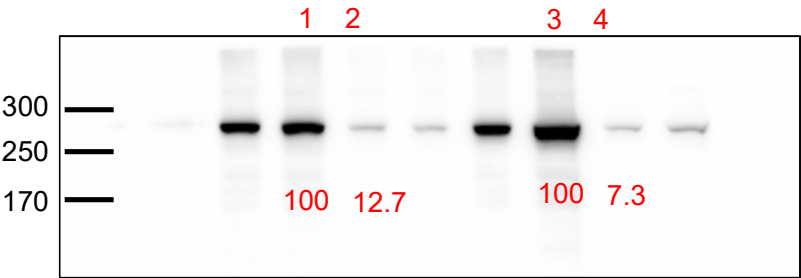

LNCaP  
1: non-targeting siRNA, 50 nM  
2: USP9x siRNA, 50 nM

PC3  
3: non-targeting siRNA, 50 nM  
4: USP9x siRNA, 50 nM

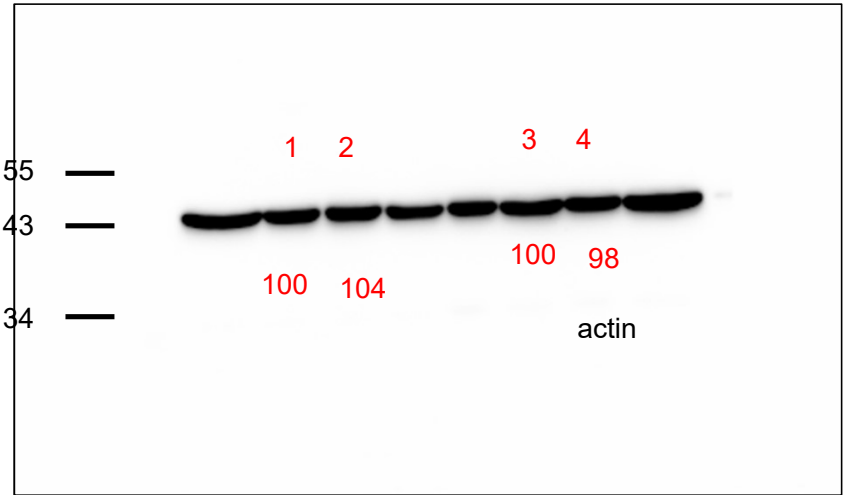

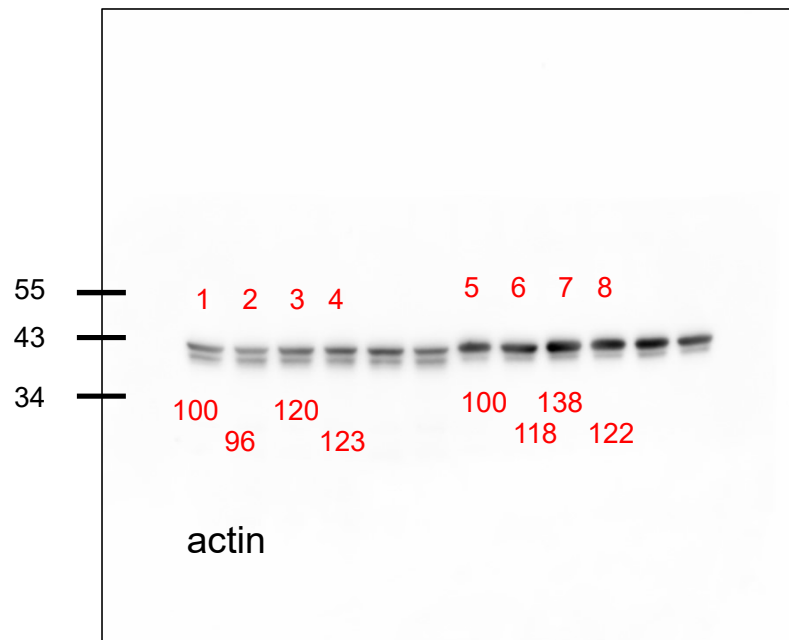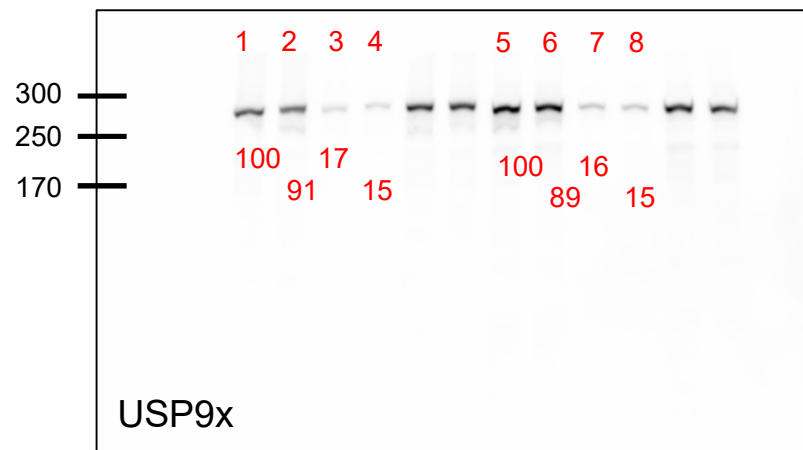

#### LNCaP

- 1: non-targeting siRNA, 0 Gy
- 2: non-targeting siRNA, 10 Gy
- 3: USP9x siRNA, 0 Gy
- 4: USP9x siRNA, 10 Gy

#### PC3

- 5: non-targeting siRNA, 0 Gy
- 6: non-targeting siRNA, 10 Gy
- 7: USP9x siRNA, 0 Gy
- 8: USP9x siRNA, 10 Gy

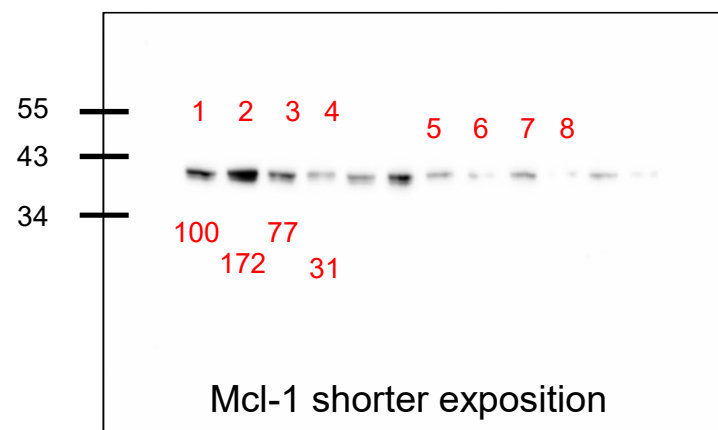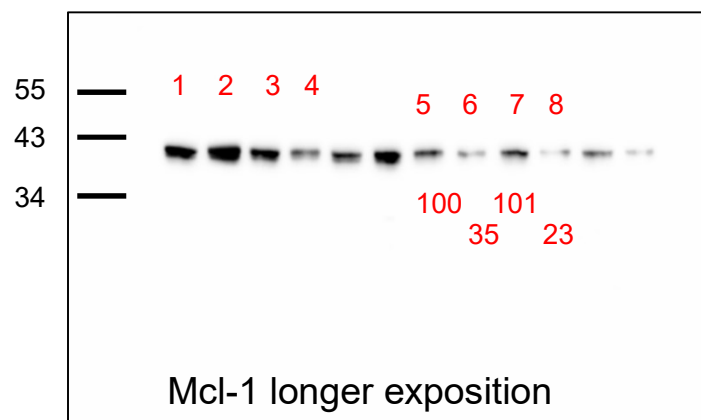

USP9x

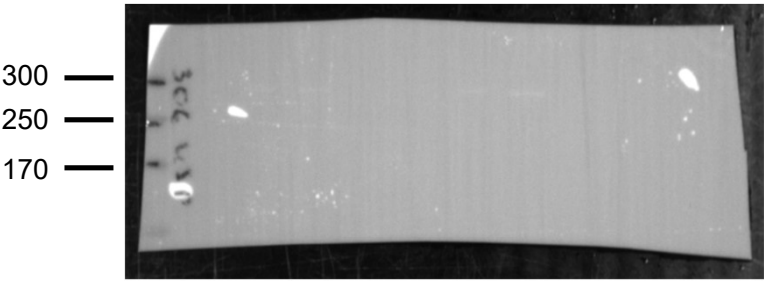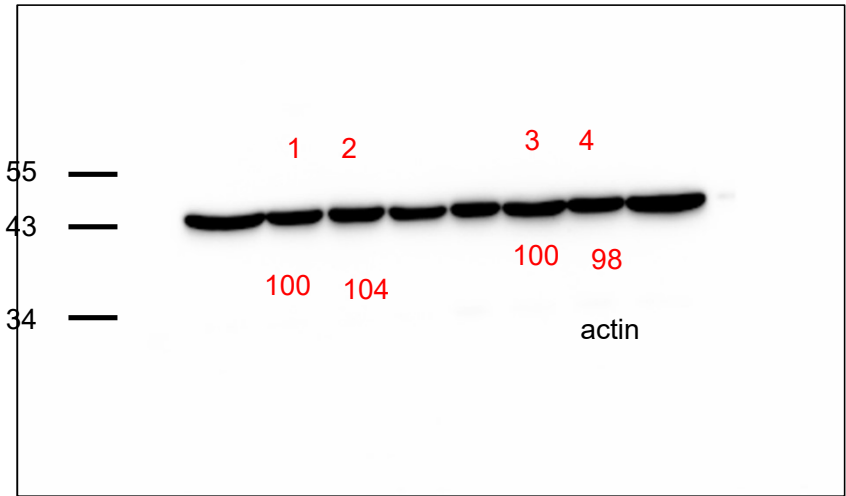

Supplement: s1 [file s1]
