# Supplementary material for: Protein Levels of Anti-Apoptotic Mcl-1 and the Deubiquitinase USP9x Are Cooperatively Upregulated during Prostate Cancer Progression and Limit Response of Prostate Cancer Cells to Radiotherapy
Source: MDPI journal article supplement (doi:10.3390/cancers15092496), 2023-04-26
Supplement: s1 [file s1]

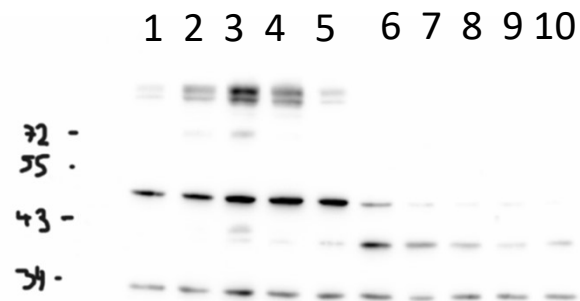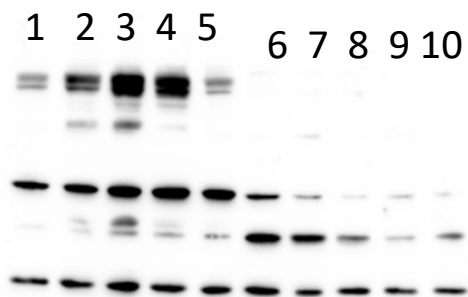

Longer exposition

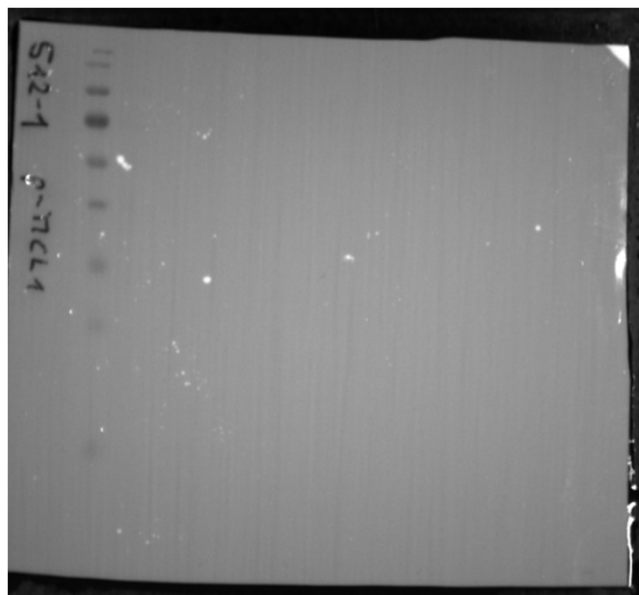

WB: phospho-MCL-1

PC3 (1-4)

1: 0 h, Ctrl 1

2: 10 Gy, 24h

3: 10 Gy, 48h

4: 10 Gy, 72h

5: 0 h, Ctrl 2

LNCaP (5-8)

6: 0 h Ctrl 1

7: 10 Gy, 24h

8: 10 Gy, 48h

9: 10 Gy, 72h

10: 0 h, Ctrl 2

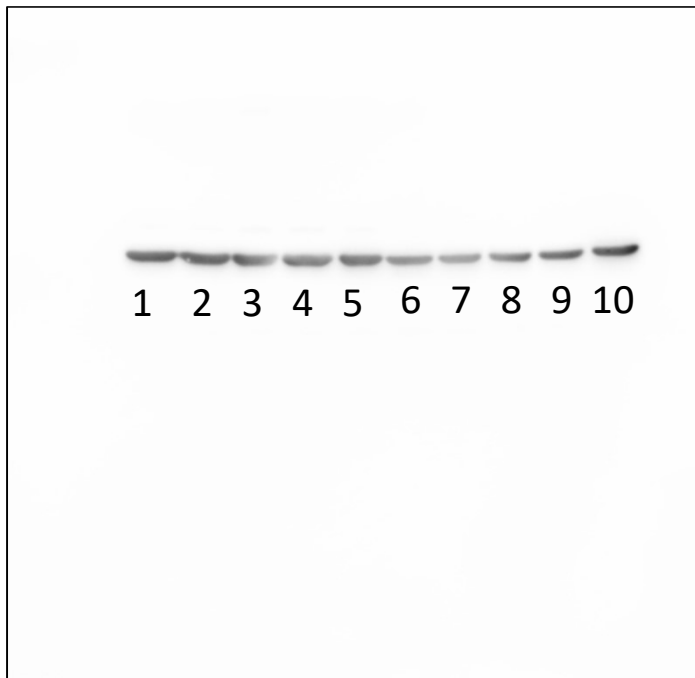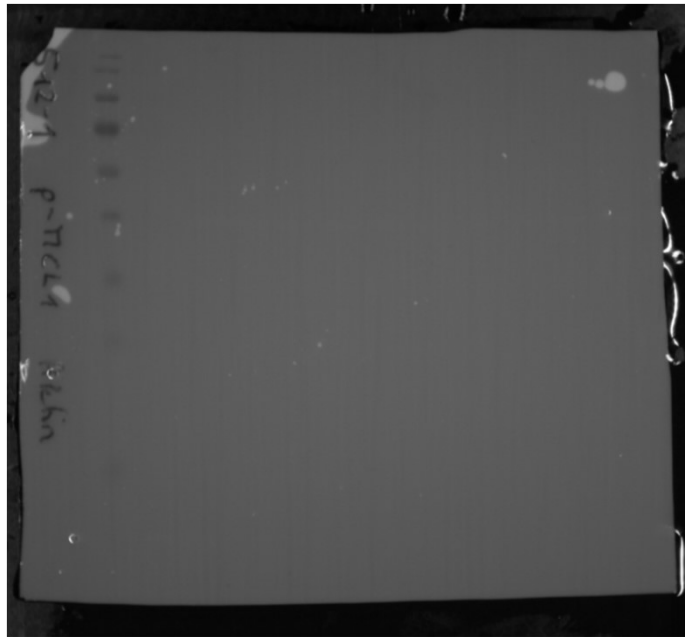

WB:  $\beta$ -actin

PC3 (1-4)

1: 0 h, Ctrl 1

2: 10 Gy, 24h

3: 10 Gy, 48h

4: 10 Gy, 72h

5: 0 h, Ctrl 2

LNCaP (5-8)

6: 0 h Ctrl 1

7: 10 Gy, 24h

8: 10 Gy, 48h

9: 10 Gy, 72h

10: 0 h, Ctrl 2

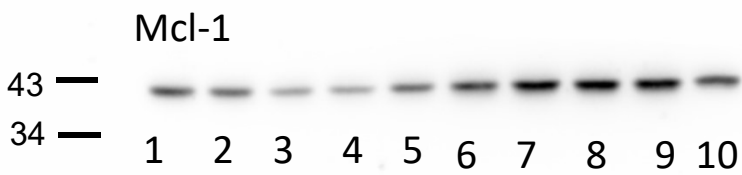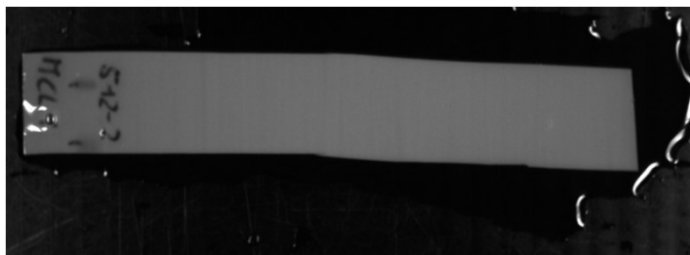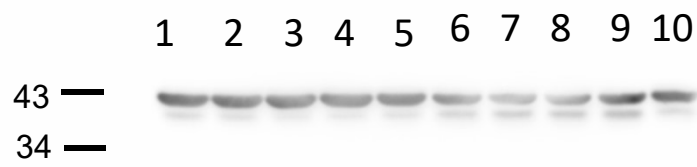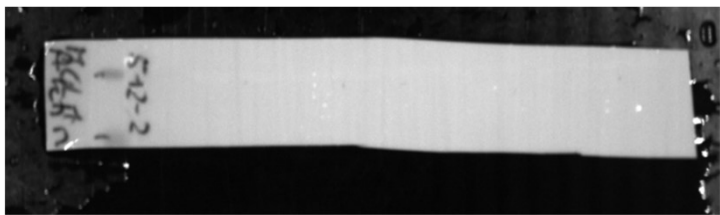

$\beta$ -actin

PC3 (1-4)

- 1: 0 h, Ctrl 1
- 2: 10 Gy, 24h
- 3: 10 Gy, 48h
- 4: 10 Gy, 72h
- 5: 0 h, Ctrl 2

LNCaP (5-8)

- 6: 0 h Ctrl 1
- 7: 10 Gy, 24h
- 8: 10 Gy, 48h
- 9: 10 Gy, 72h
- 10: 0 h, Ctrl 2

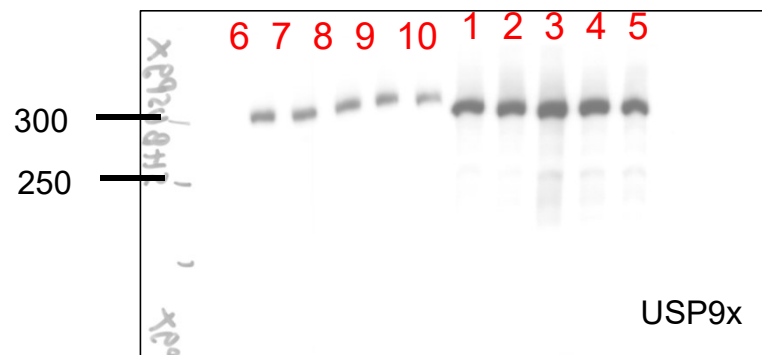

PC3 (1-4)  
 1: 0 h, Ctrl 1  
 2: 10 Gy, 24h  
 3: 10 Gy, 48h  
 4: 10 Gy, 72h  
 5: 0 h, Ctrl 2

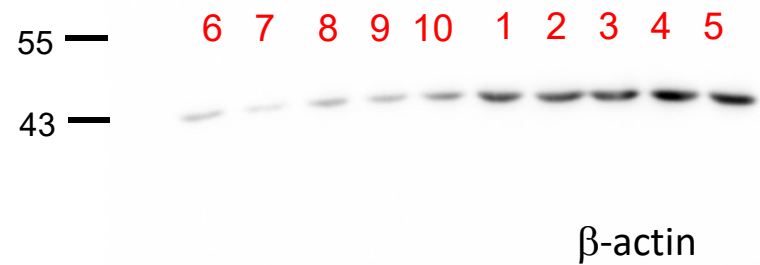

LNCaP (5-8)  
 6: 0 h Ctrl 1  
 7: 10 Gy, 24h  
 8: 10 Gy, 48h  
 9: 10 Gy, 72h  
 10: 0 h, Ctrl 2

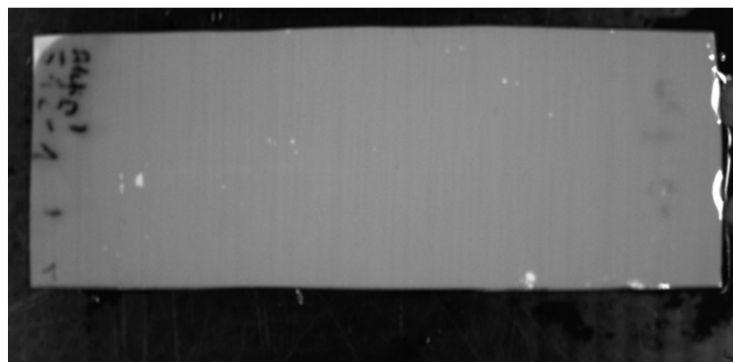

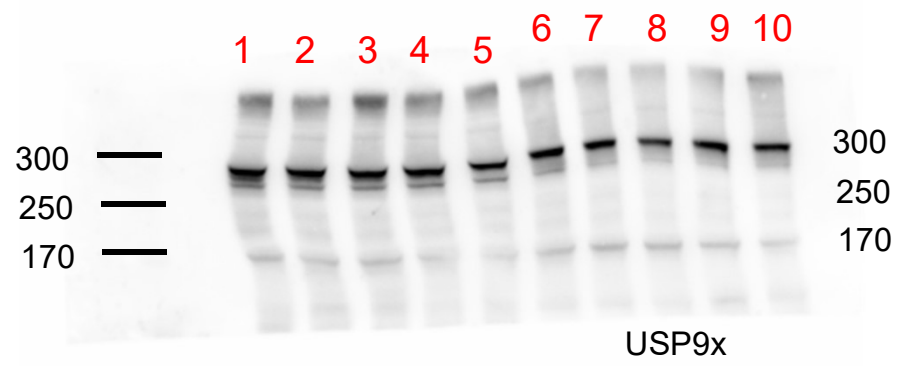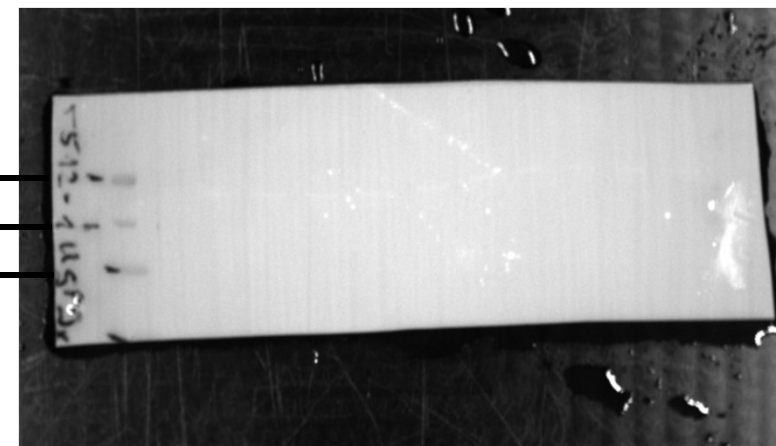

PC3 (1-4)  
1: 0 h, Ctrl 1  
2: 10 Gy, 24h  
3: 10 Gy, 48h  
4: 10 Gy, 72h  
5: 0 h, Ctrl 2

LNCaP (5-8)  
6: 0 h Ctrl 1  
7: 10 Gy, 24h  
8: 10 Gy, 48h  
9: 10 Gy, 72h  
10: 0 h, Ctrl 2

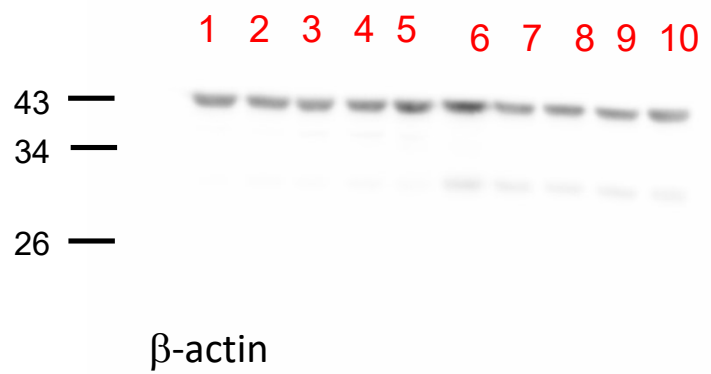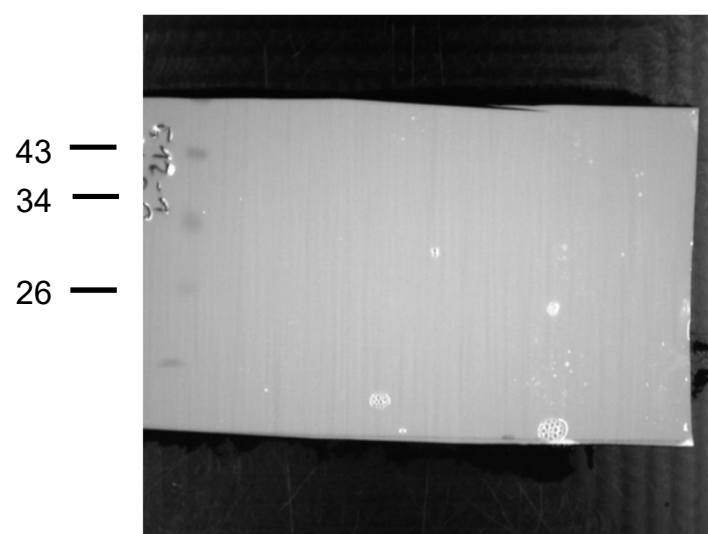

WB:  $\beta$ -actin

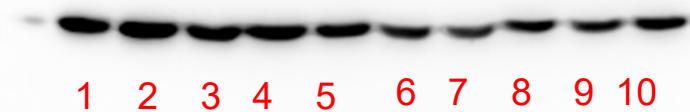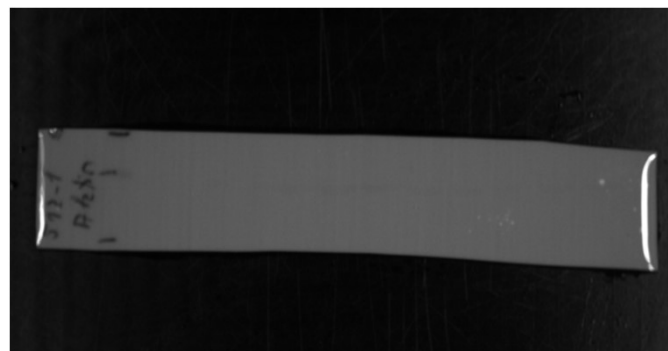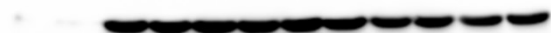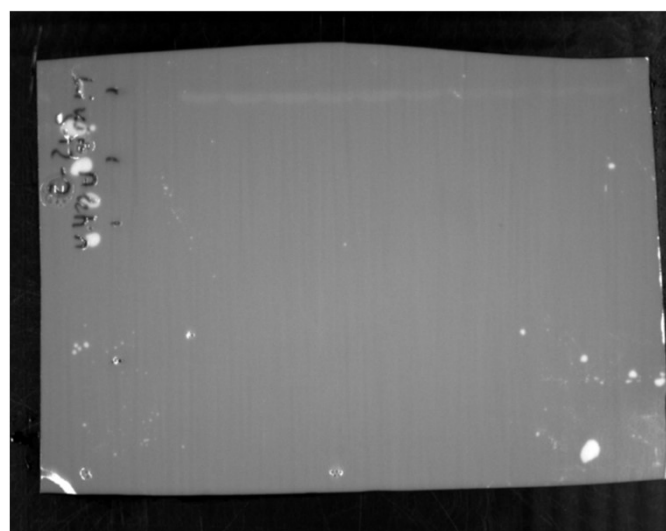

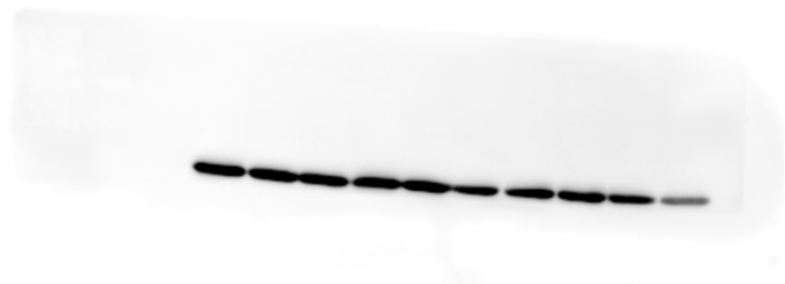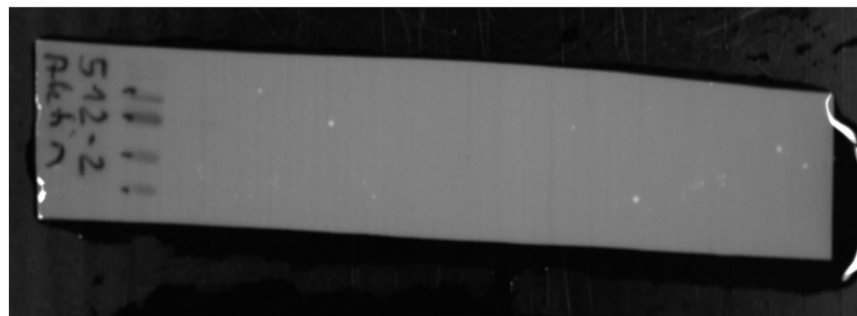

WB:  $\beta$ -actin  
(ctrl to?)

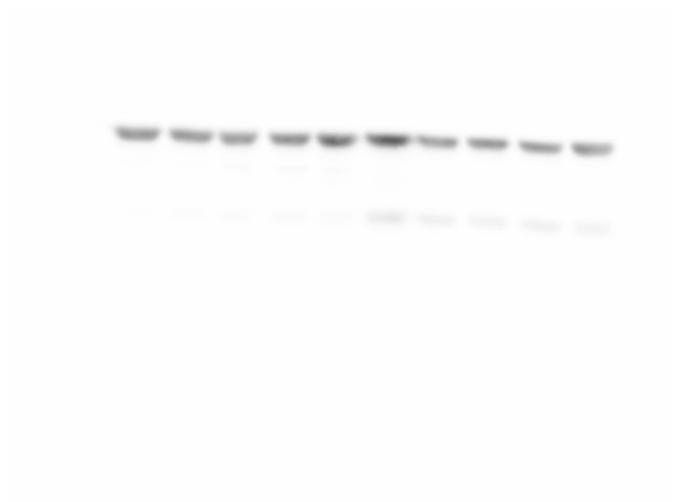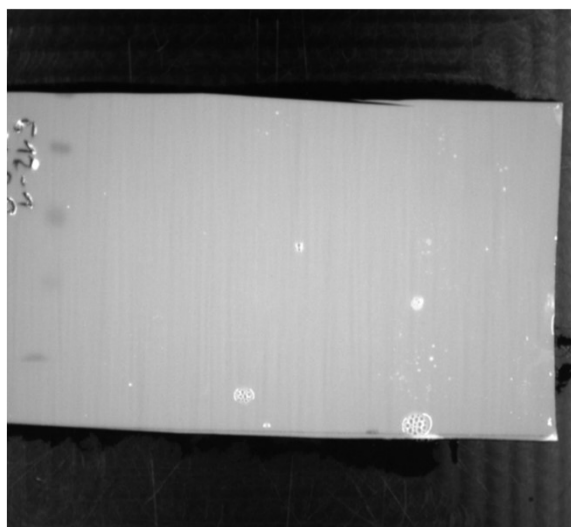

WB:  $\beta$ -actin  
(ctrl to XIAP/XIAP?)

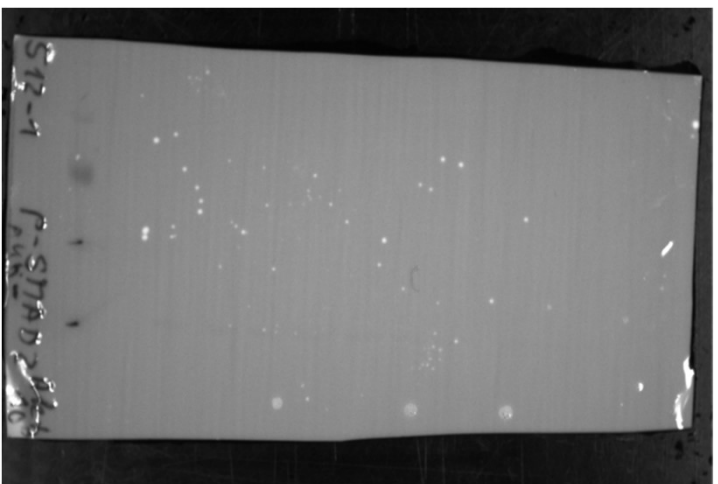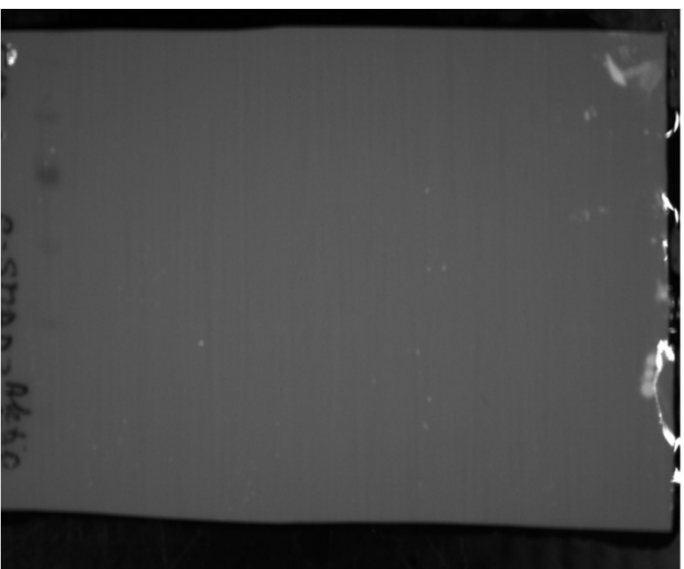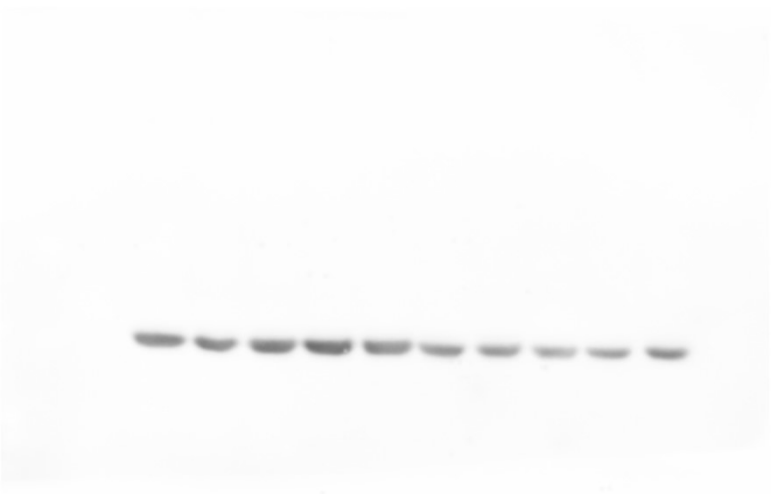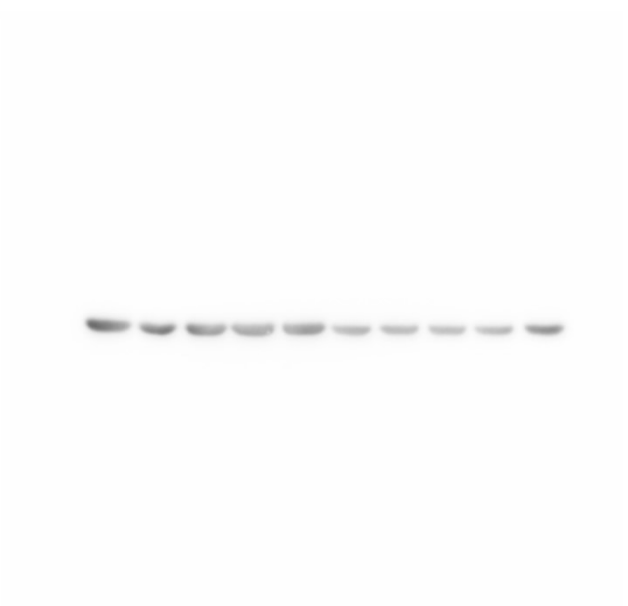



1 2 3 4 5 6 7 8

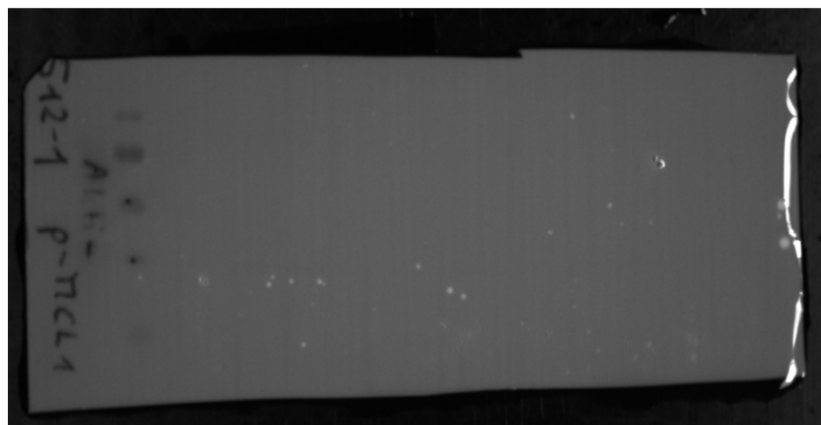

WB:  $\beta$ -actin  
(ctrl to phospho-Mcl-1)

WB: MCL-1

PC3 (1-4)

1: 0h

2: 10 Gy, 24h

3: 10 Gy, 48h

4: 10 Gy, 72h

LNCaP (5-8)

5: 0h

6: 10 Gy, 24h

7: 10 Gy, 48h

8: 10 Gy, 72h
