# Supplementary material for: Protein Levels of Anti-Apoptotic Mcl-1 and the Deubiquitinase USP9x Are Cooperatively Upregulated during Prostate Cancer Progression and Limit Response of Prostate Cancer Cells to Radiotherapy
Source: MDPI journal article supplement (doi:10.3390/cancers15092496), 2023-04-26
Supplement: s1 [file s1]

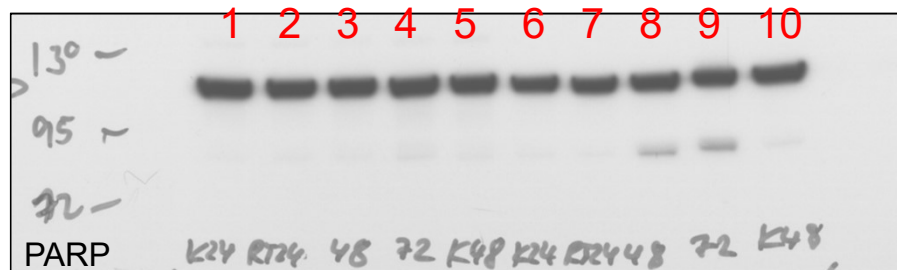

### LNCaP

- 1: 0 h, Ctrl 1
- 2: 24 h, 10 Gy
- 3: 48 h, 10 Gy
- 4: 72 h, 10 Gy
- 5: 0 h, Ctrl 2

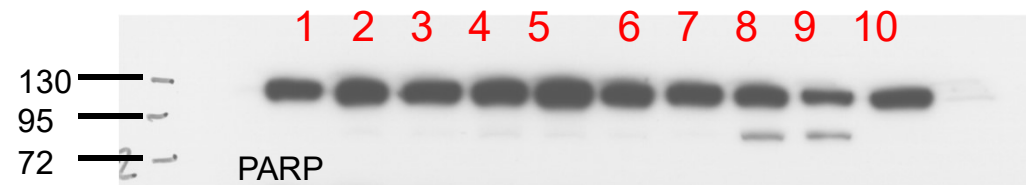

### PC3:

- 6: 0 h, Ctrl 1
- 7: 24 h, 10 Gy
- 8: 48 h, 10 Gy
- 9: 72 h, 10 Gy
- 10: 0 h, Ctrl 2

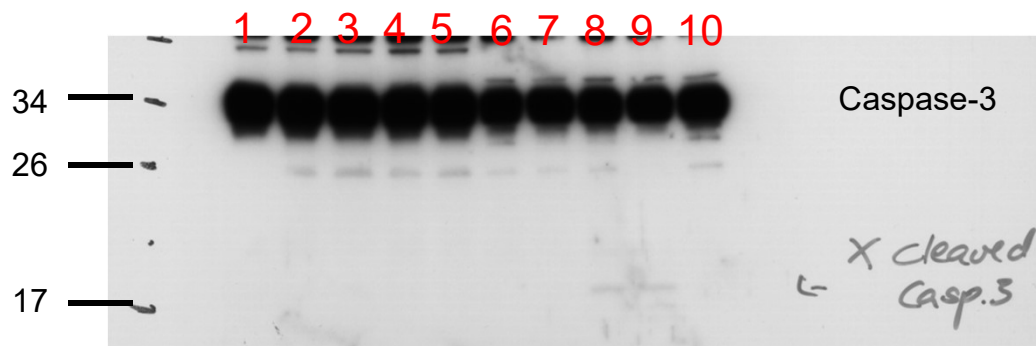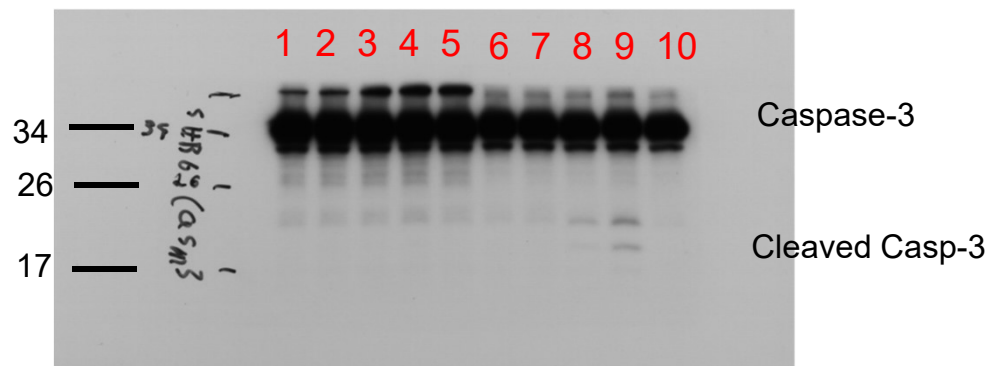

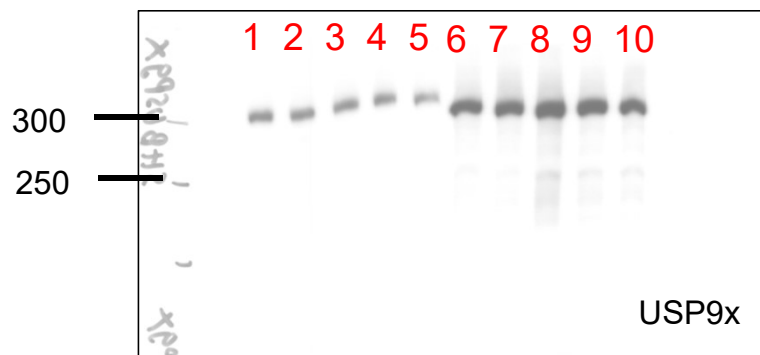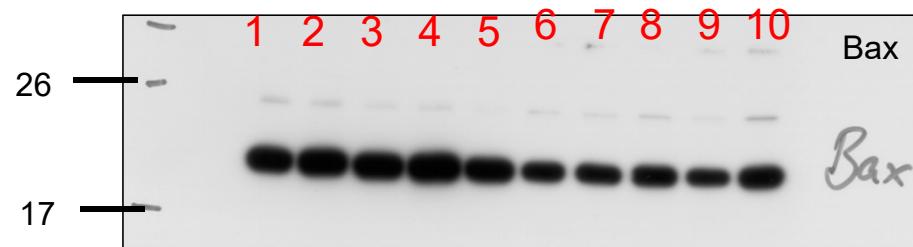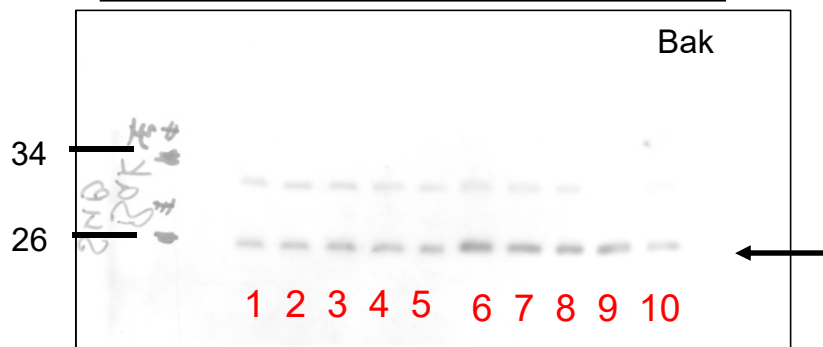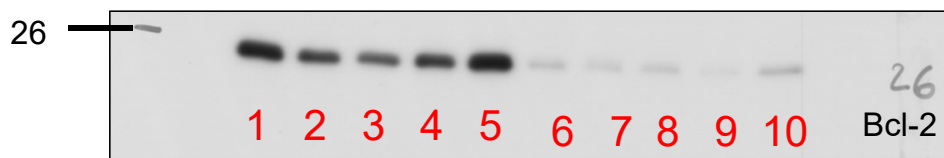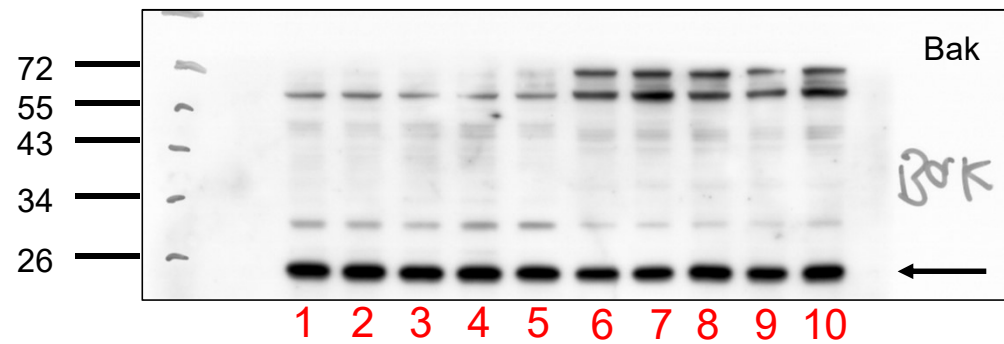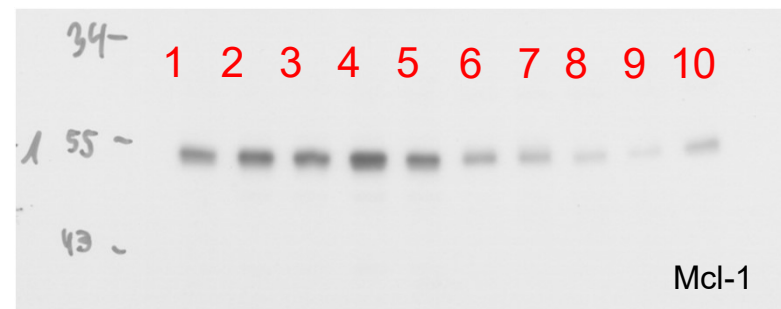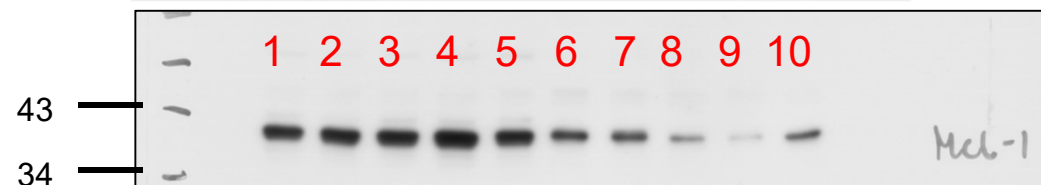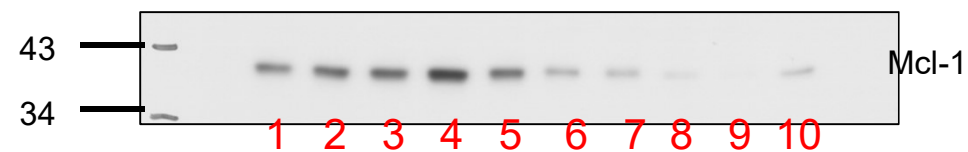

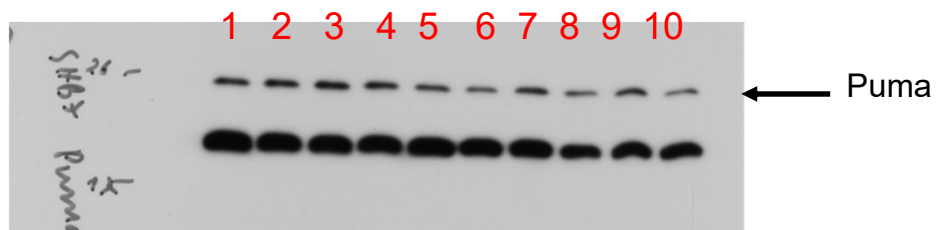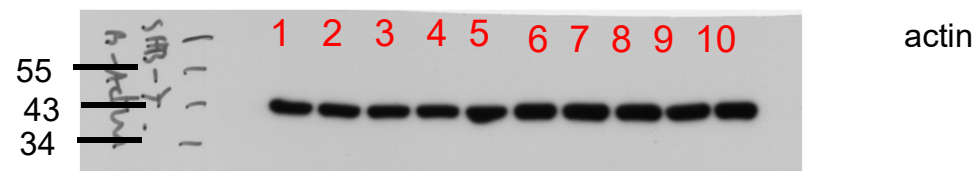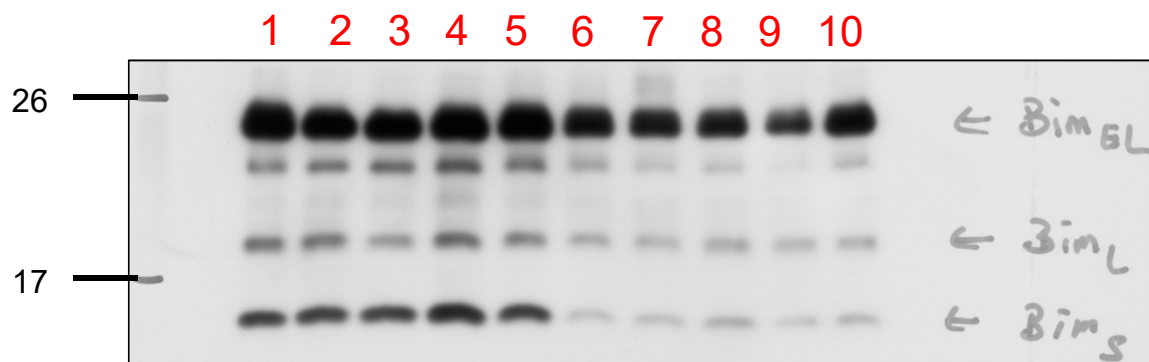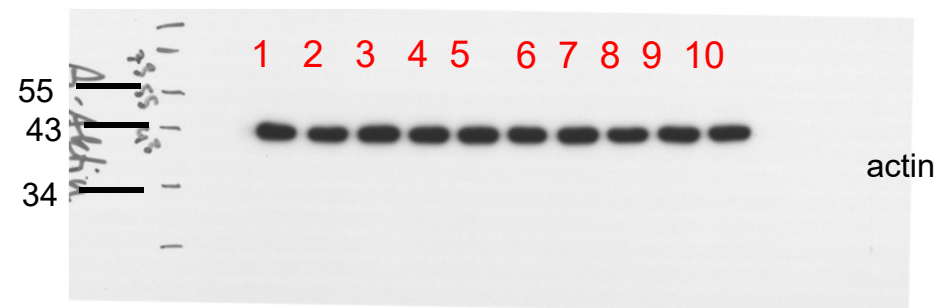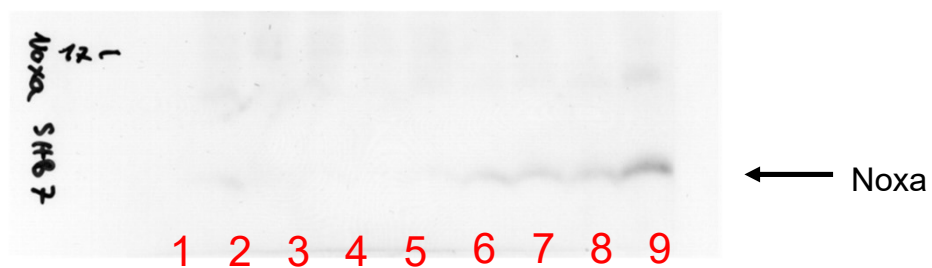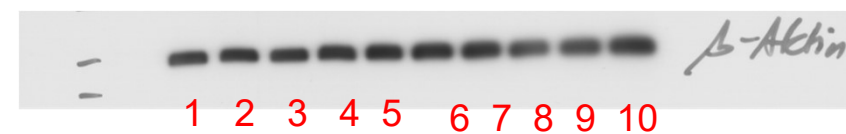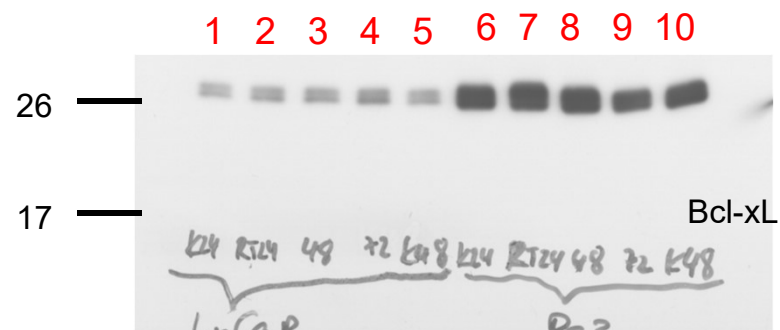

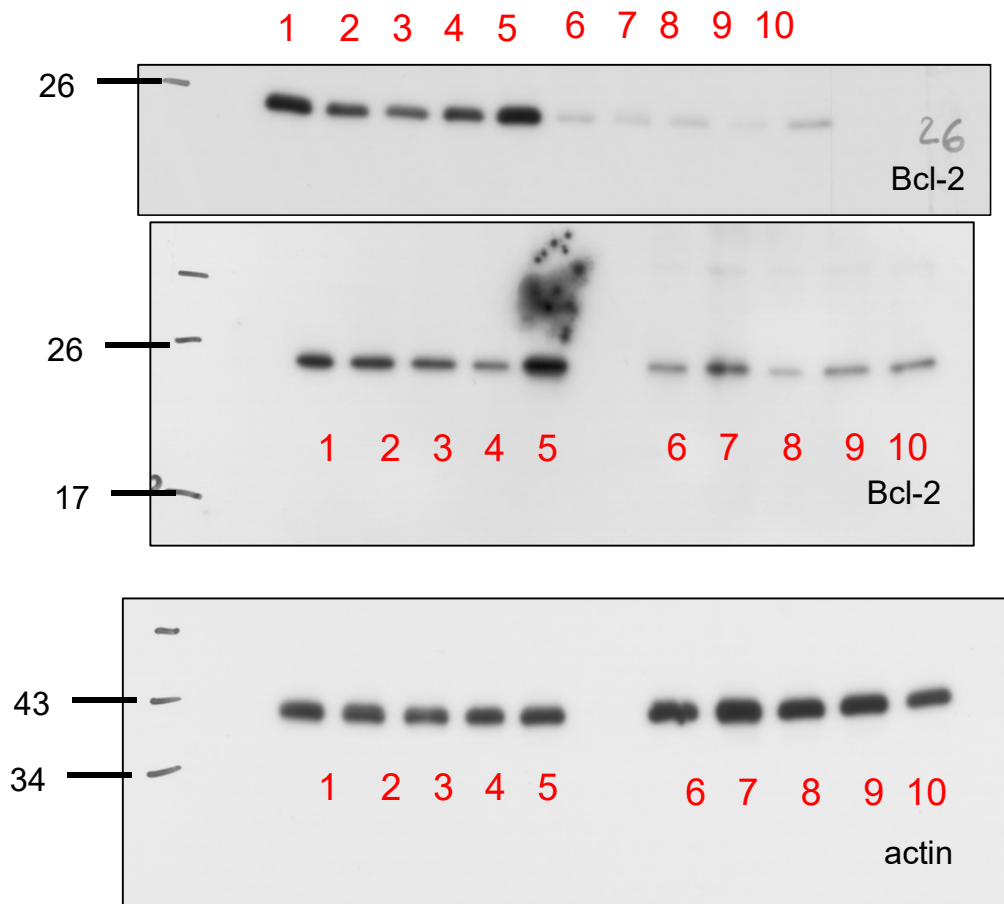

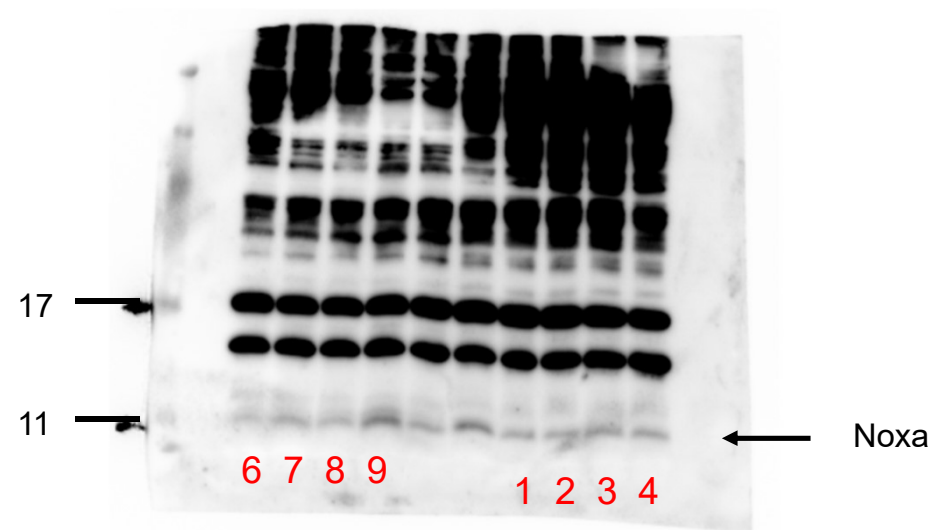

### LNCaP

- 1: 0 h, Ctrl 1
- 2: 24 h, 10 Gy
- 3: 48 h, 10 Gy
- 4: 72 h, 10 Gy
- 5: 0 h, Ctrl 2

### PC3:

- 6: 0 h, Ctrl 1
- 7: 24 h, 10 Gy
- 8: 48 h, 10 Gy
- 9: 72 h, 10 Gy
- 10: 0 h, Ctrl 2

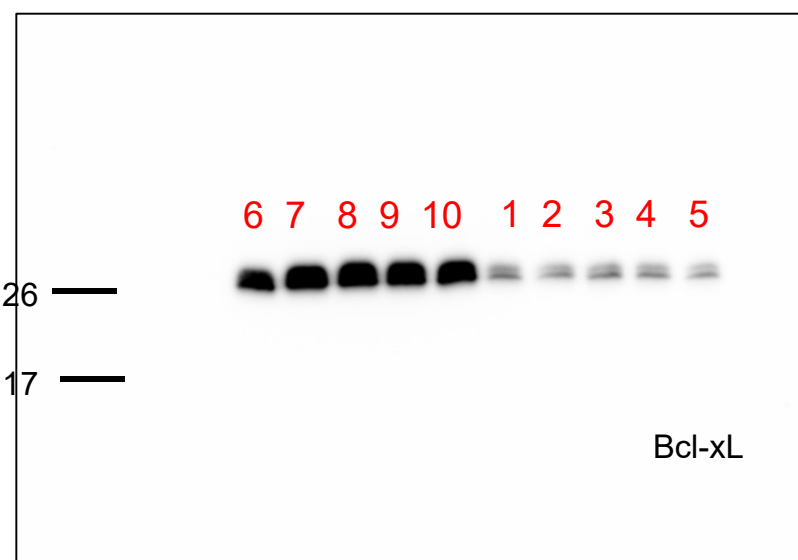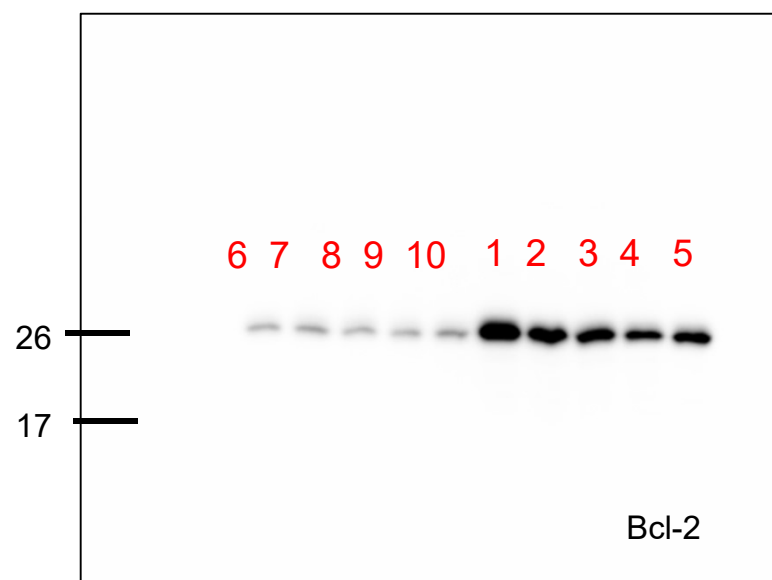

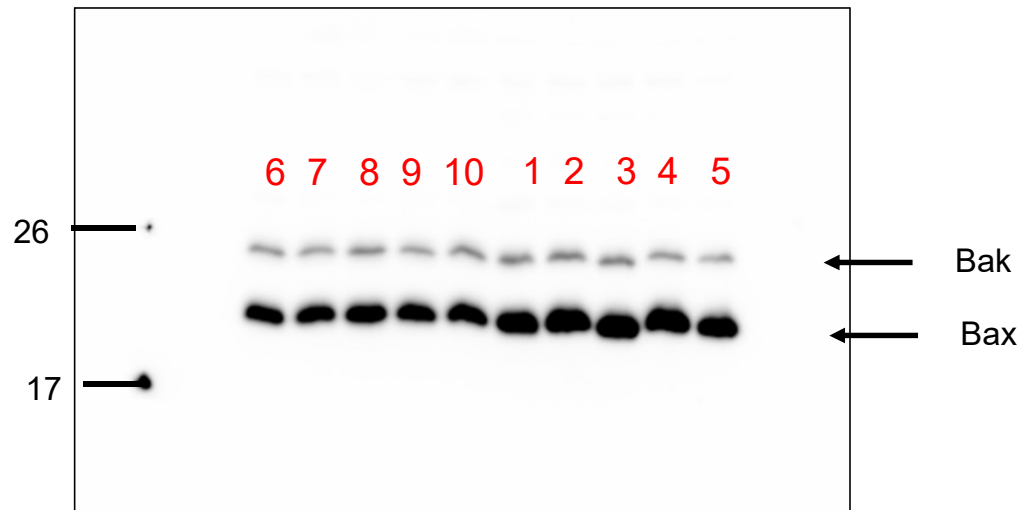

### LNCaP

1: 0 h, Ctrl 1  
2: 24 h, 10 Gy  
3: 48 h, 10 Gy  
4: 72 h, 10 Gy  
5: 0 h, Ctrl 2

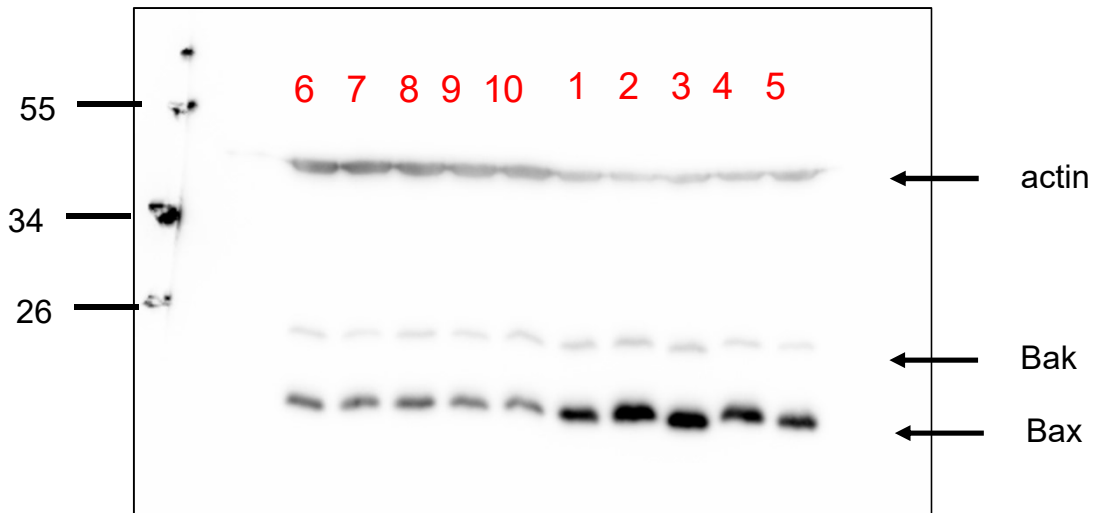

### PC3:

6: 0 h, Ctrl 1  
7: 24 h, 10 Gy  
8: 48 h, 10 Gy  
9: 72 h, 10 Gy  
10: 0 h, Ctrl 2

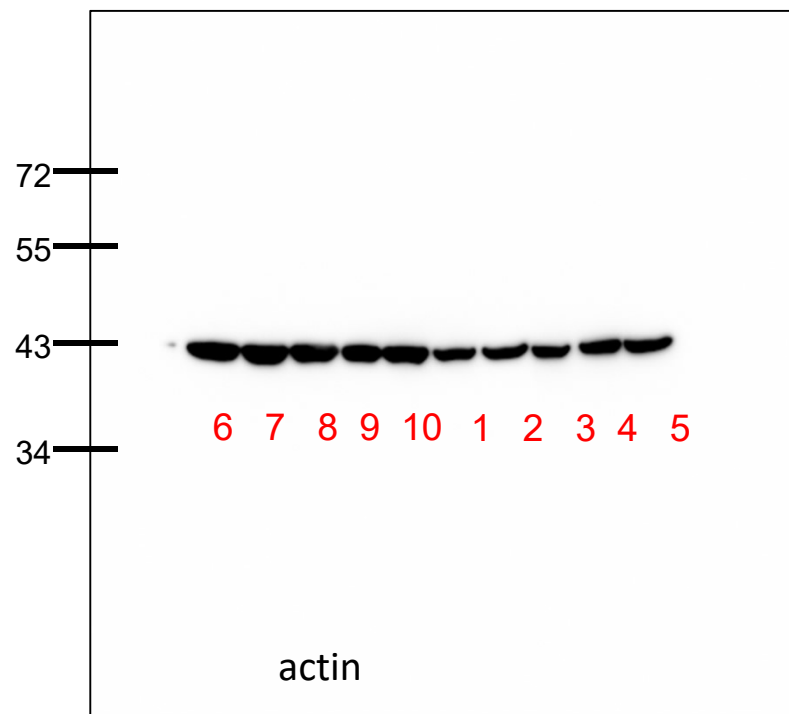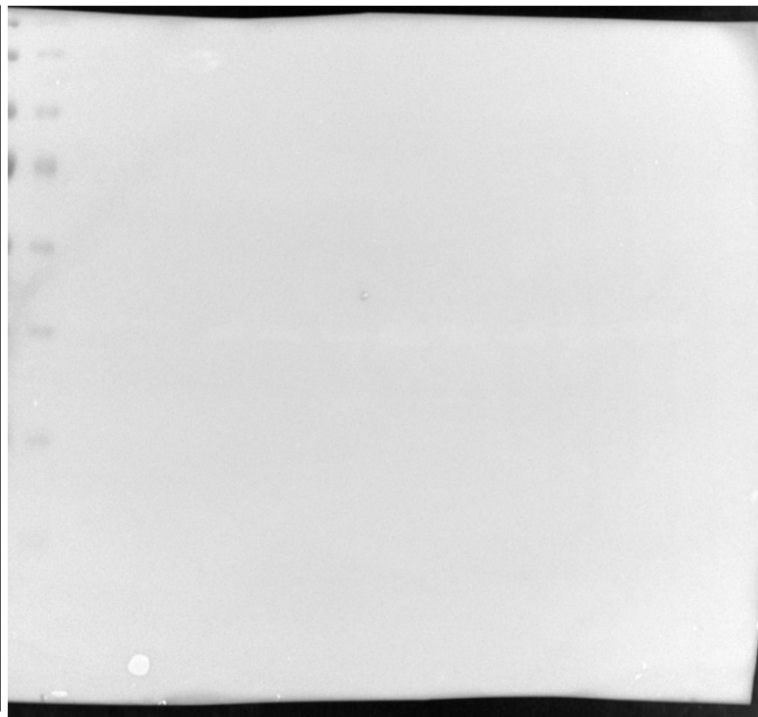

### LNCaP

- 1: 0 h, Ctrl 1
- 2: 24 h, 10 Gy
- 3: 48 h, 10 Gy
- 4: 72 h, 10 Gy
- 5: 0 h, Ctrl 2

### PC3:

- 6: 0 h, Ctrl 1
- 7: 24 h, 10 Gy
- 8: 48 h, 10 Gy
- 9: 72 h, 10 Gy
- 10: 0 h, Ctrl 2
