# Supplementary figures and images for: Protein Levels of Anti-Apoptotic Mcl-1 and the Deubiquitinase USP9x Are Cooperatively Upregulated during Prostate Cancer Progression and Limit Response of Prostate Cancer Cells to Radiotherapy
Source: MDPI journal article supplement (doi:10.3390/cancers15092496), 2023-04-26

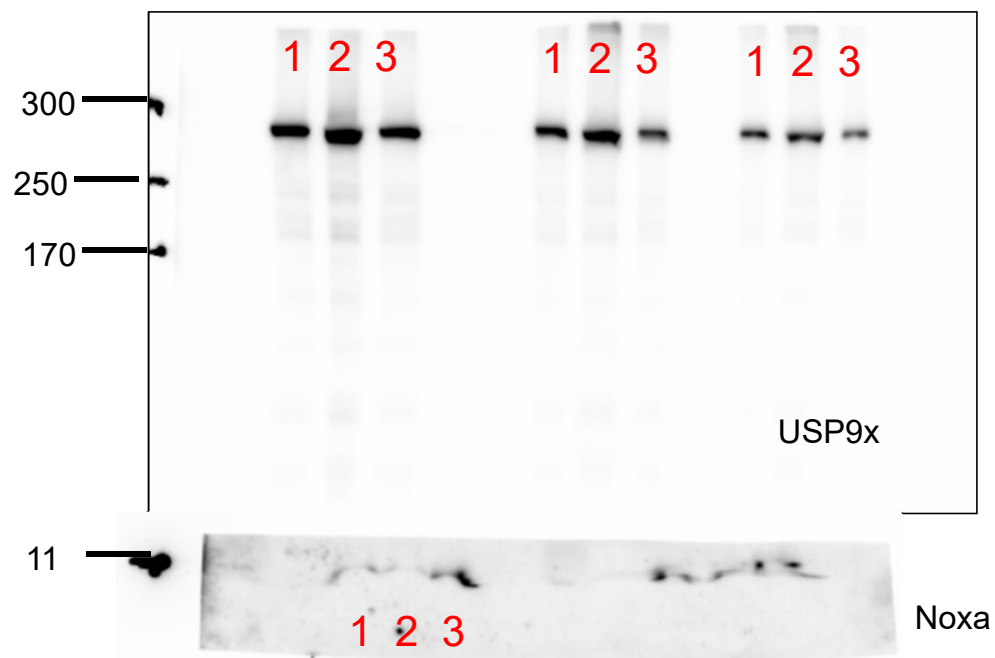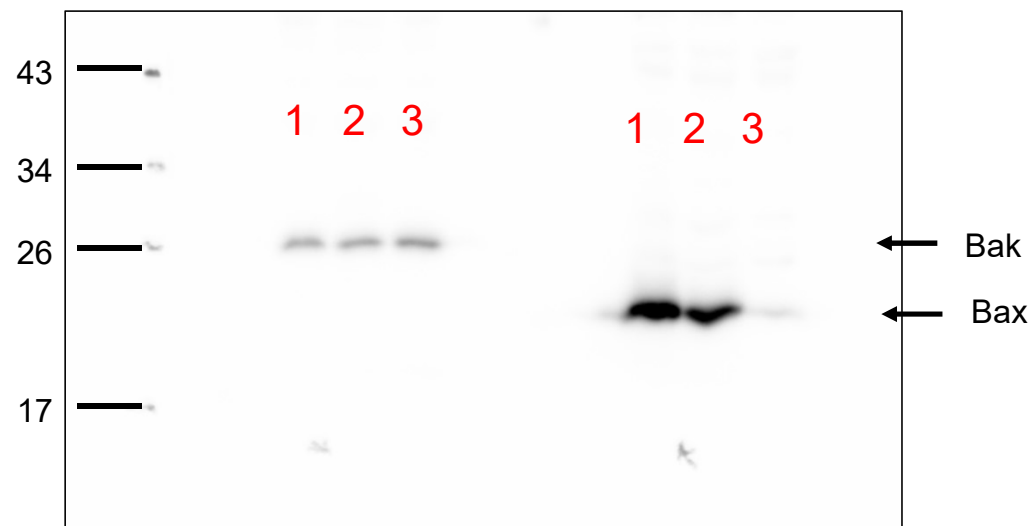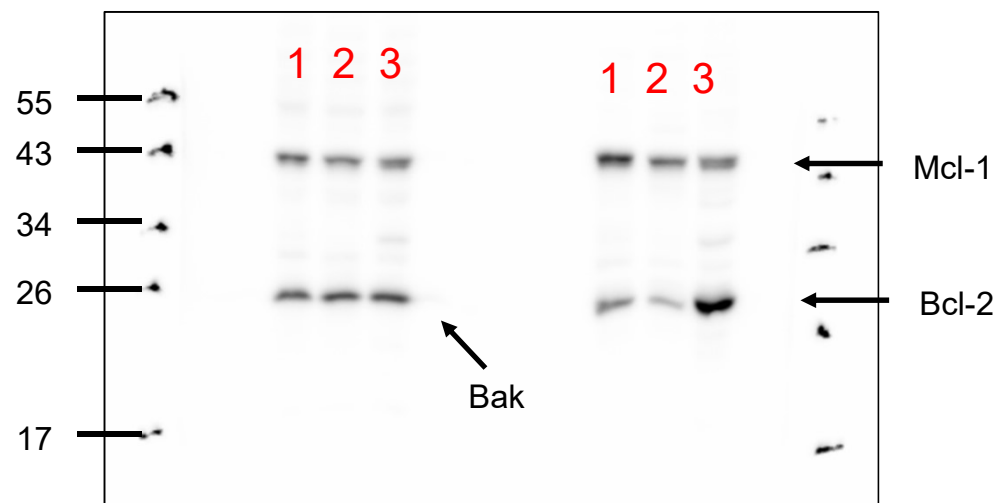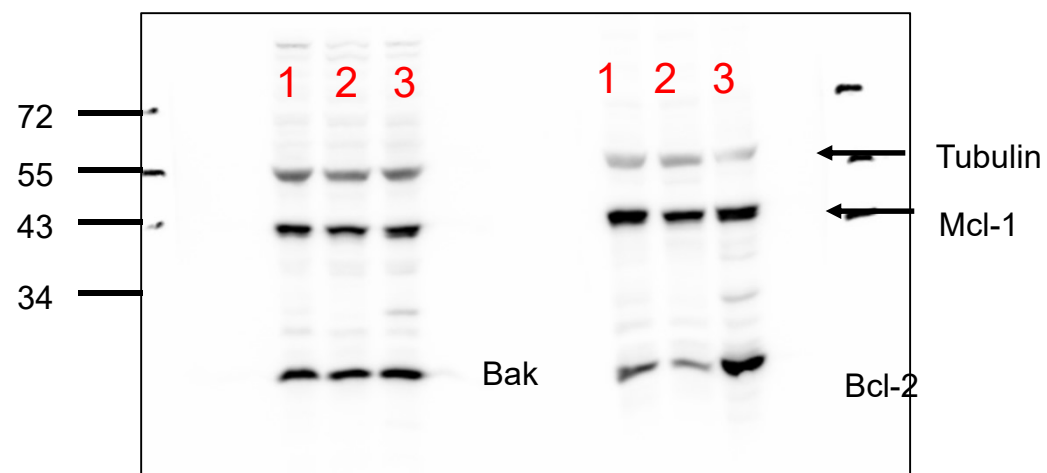

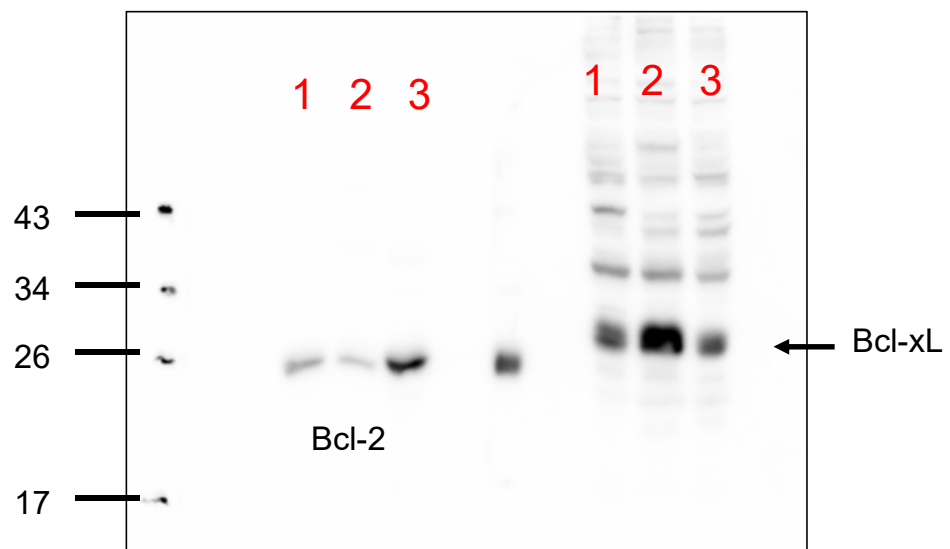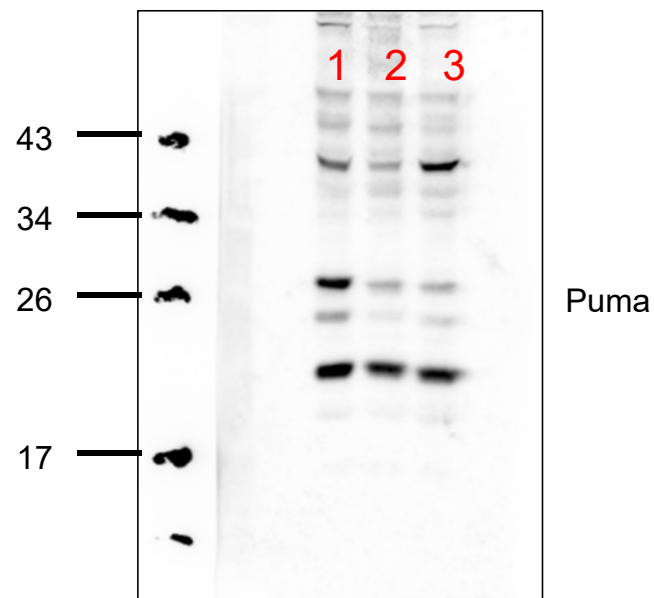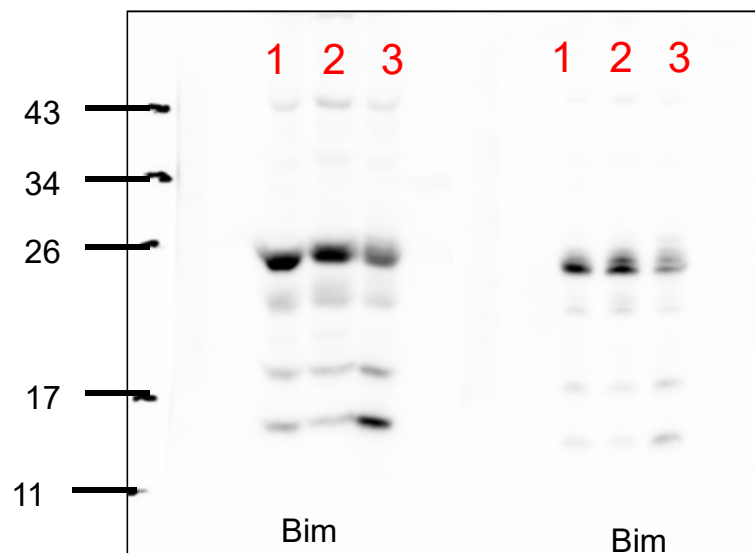

1: LNCaP  
2: PC3  
3: Jurkat E6.1

Supplement: s1 [file s1]
